# Supplementary material for: CLOCK is suggested to associate with comorbid alcohol use and depressive disorders
Source: Springer Nature journal article supplement (doi:10.1186/1740-3391-8-1), 2010-01-21
Supplement: Additional file 1 [file 1740-3391-8-1-s1.doc]

Table S1. The primer and reporter sequences for the Custom TaqMan® SNP Genotyping Assays.

|  | ***FDFT1* rs11549147** | ***PER2* 10870** | ***ADA* 22G>A (Asp8Asn)** |
| --- | --- | --- | --- |
| **Primer1** | GCTCAGCAGCAGCCTGAA | AAGCCGACTTTGCCTGAGT | CGCACGAGGGCACCAT |
| **Primer2** | CGAAACTGCGACTGGTCTGATT | ACAAGGAGCCGGGTTCTG | TGGGCCCCGCTAAGC |
| **Reporter1** | CTTGCTACAAGTATCTC | CTTGGGCATTTTCAT | ACTTTGGGCTTGTCGAA |
| **Reporter2** | TTGCTACAGGTATCTC | TTGGGCGTTTTCAT | ACTTTGGGCTTGTTGAA |
